# Supplementary material for: Rs4846049 Polymorphism at the 3′-UTR of MTHFR Gene: Association with Susceptibility to Childhood Acute Lymphoblastic Leukemia
Source: Biomed Res Int. 2019 Oct 13;2019:4631091. doi: 10.1155/2019/4631091 (PMC6815600; doi:10.1155/2019/4631091)
Supplement: Supplementary Materials — Raw data of patients and control: the clinical characteristics and SNP sequencing results of patients and control are included. [file 4631091.f1.xlsx]

## Sheet: ALL
Case	SNP	Sex	WBC(*10^9/L)	Hb(g/L)	Platelet (*10^9/L)	Lymphadenopathy	FAB classification	Organomegally (1 = positive/0 = negative)	CSF（1= positive/0 = negative）	Immunophenotype (T/B/Mixed)	Genetic change (genes)	Genetic change (karyotypic)	Disease risk (Low/Intermediate/High)
1	G	F	6.81	108	227	1	L2	1	0	T	Normal	Normal	Intermediate
2	G	M	36.16	80	29	1	L2	1	0	B	Normal	Normal	Low
3	G	M	2	89	424	1	L2	1	0	B	Normal	Abnormal, 46，XY,dic(9;20)(p11.2;q11.2)[18]/46,XY[2]	Low
4	G	M	3.19	89	258	1	L2	1	0	B	Normal	Normal	Low
5	G/T	M	2.72	86	109	1	L2	1	0	B	Normal	Normal	Low
6	G	M	232.44	84	98	1	L2	1	0	T	MLL break	Abnormal,48,XY,der(2)del(2)(p13p23)del(2)(q32q37),+del(6)(q13q23),+8,add(10)(p13),t(11；19)(q23;p13.3),add(18)(q21)[20]	Intermediate
7	G/T	M	4.91	60	111	0	L3	0	0	B	TEL-AML1fusion	Normal	Low
8	G	M	16.56	78	36	1	L2	1	0	B	Normal	Abnormal,56,XY,+X,+4,+6,+8,+10,+14,+17,+18,+21,+21[15]/46,XY[5]	Low
9	G	M	73.86	106	41	0	L2	1	0	B	TEL-AML1fusion	Normal	Intermediate
10	G	M	9.29	69	46	1	L2	0	0	B	TEL-AML1fusion	Normal	Low
11	G	M	5.61	88	30	0	Unknown	1	0	B	TEL-AML1fusion	Normal	Low
12	G/T	F	2.73	74	34	0	L2	1	0	B	Normal	Abnormal,58，XX,+X,+4,+5,+6,+8,+9,+10,+14,+15,+17,+18,+add(21)(q22)[12]/46,XX[8]	Low
13	G/T	M	13.85	51	25	1	L3	0	0	B	Normal	Abnormal,65,XXY,der(1)(p36.1),-2,-6,del(7)(q31),+8,-9,+10,del(13)(q12q33),-15,-16,-19,-20,+21[19]/46,XY[1]	Low
14	G/T	M	2.85	124	285	1	L2	1	0	B	Normal	Abnormal,54,XY,+X,+6,+10,+11,+14,+18,+21,+21[19]/57,idem,+8,+8,+i(17)(q10)[1]	Low
15	G	M	70.15	65	8	1	L2	1	0	B	Normal	Abnormal, 57,XY,+X,dup(1)(q21q42),+4,+6,+8,+8,+14,+17,+18,+18,+21,+21[16]/46,XY[4]	Intermediate
16	G	M	3.29	161	127	1	Unknown	0	0	B	Normal	Normal	High
17	G/T	M	10.58	101	24	1	L2	1	0	B	TCF3/PBX1fusion	Normal	Low
18	G	F	39.95	107	93	1	L2	1	0	T	Normal	Abnormal,45,XX,der(13;14)(q10;q10)[20]	Intermediate
19	G/T	F	52.72	68	8	1	L2	1	0	B	TCF3/PBX1fusion	Abnormal,47,XX,der(5)(?),der(19)t(1;19)(q23;p13),+mar[20]	Intermediate
20	G	M	11.25	92	48	1	L2	0	0	B	TEL-AML1fusion	Abnormal,47,XY,+16[17]/46,XY[3]	Low
21	G	M	4.26	51	83	1	L2	1	0	B	Normal	Normal	Low
22	G	M	2.74	77	39	1	L2	1	0	B	BCR, ABL1, ASS2 tri-colour fusion	Abnormal,55,XY,+X,t(1;15)(p36.1;q11.2),+8,+8,t(9;22)(q34;q11.2),+11,+18,+19,+21,+der(22)t(9;22)(q34;q11.2)[7]/46,XY[13]	Low
23	G	F（	3.65	75	38	1	L3	1	0	B	Normal	Normal	Low
24	G	M（	1.26	95	10	0	Unknown	0	0	B	Normal	Abnormal,59,XY,+X,+5,+6,+8,+10,+13,+14,+18,+20,+21,+21,+21[3]/46,XY[4]	Low
25	G	F（	5.42	73	60	1	L2	0	0	B	Chromosome deficiency	Normal	Low
26	G/T	F（	2.72	85	160	1	L2	0	0	B	Normal	Normal	Low
27	G	M（	45.58	114	45	1	L2	1	0	B	Normal	Abnormal,50,XY,+X,+3,+6,+8,+9,+10,+17,+18,+21,+21[5]/46,XY[15]	Intermediate
28	G	F（	412.49	75	21	0	L2	1	0	B	BCR, ABL1, ASS2 tri-colour fusion	Abnormal,46,XX,t(9;22)(q34;q11.2)[20]	Intermediate
29	G	M（	117.84	98	33	1	L1	1	0	B	TCF3/PBX1fusion	Abnormal,46,XY,der(19)t(1;19)(q23;p13)[12]/46,XY[8]	Intermediate
30	G	M（	10.01	61	89	1	L2	1	0	B	Normal	Normal	Low
31	G/T	M（	9.58	84	123	1	L2	1	0	B	Normal	Abnormal,54,XY,+X,+4,+6,+10,+14,+15,+17,+21[7]/54,idem,dup(1)(q21q23)[8]/46,XY[10]	Low
32	G	F（	2.22	88	58	1	L3	1	0	B	Normal	Normal	Low
33	G	M（	3.84	70	178	1	L2	1	0	B	Normal	Abnormal,58,XY,+X,dup(1)(q23q42),+4,+6,+9,+10,+11,+14,+17,+18,+20,+21,+21[8]/46,XY[12]	Low
34	G	M	3.56	107	302	1	L2	1	0	B	Normal	Abnormal,66,XY,dup(1)(q23q32),+2,+4,+5,+6,+8,+9,+10,+12,+14,+15,+15,+17,+18,+18,+21,+21,+22,+22,+X,+Y[8]/46,XY[12]	Low
35	G	M	12.81	79	10	1	L2	0	0	B	TCF3/PBX1fusion	Abnormal,47,XY,+10,der(19)t(1;19)(q23;p13),del(20)(q13.1)[3]/47,idem,der(11)t(1;11)(q23;q13)[1]/46,XY[16]	Intermediate
36	G/T	M	4.16	78	67	1	L2	0	0	B	TEL-AML1fusion	Abnormal,46,XY,t(1;12)(q23;p13)[18]/46,XY[2]	Low
37	G	M	1.82	87	9	1	Unknown	0	0	T	Normal	Normal	Intermediate
38	G	M	7.07	79	52	0	L2	1	0	B	Normal	Normal	Intermediate
39	G	F	1.6	87	118	0	L2	1	0	B	Normal	Normal	Low
40	G	M	31.53	89	156	1	L1	1	0	B	Normal	Normal	Low
41	G	M	21.75	75	25	1	L2	1	0	T	Normal	Normal	Intermediate
42	G	F	12.1	77	39	1	L2	0	0	B	TEL-AML1fusion	Normal	Low
43	G	M	2.9	95	290	0	L2	0	0	B	Normal	Abnormal,68,,XY,+X,+1,+1,+4,+5,+6,+8,+9,+10,+11,+11,+14,+15,+18,+19,+20,+20,+21,+21,+21,+mar/46,XY	Intermediate
44	G	M	4.75	98	164	0	L3	0	0	B	TEL-AML1fusion	Normal	Low
45	G	M	3.6	121	412	0	L2	0	0	B	Normal	Normal	Low
46	G/T	F	223.19	106	30	0	L2	1	1	B	MLL break	Abnormal,46,XX,t(4;11)(q21;q23)[14]/46,XX[6]	High
47	T	F	115.9	125	135	1	L3	1	0	T	C-myc break	Normal	Intermediate
48	G/T	F	5.06	82	368	1	L2	0	0	B	TEL-AML1fusion	Normal	Low
49	G/T	M	2.42	65	71	0	L1	1	0	B	Normal	Normal	Low
50	G/T	M	12.8	82	15	1	L2	1	0	B	Normal	Abnormal,55,XY,+X,+6,+10,+14,+15,+17,+18,+21,+21[20]	Intermediate
51	G	F	15.33	89	61	1	L2	1	0	B	Normal	Abnormal,46,XX,1qh+,der(4)t(4;10)(p14;q22),der(7)t(7;9)(p13;p21)del(7)(q23),add(9)(p22),der(9)t(4;9)(p10;q10),del(10)(q11.2)[18]/46,XX[2]	Intermediate
52	G	M	3.07	87	337	0	L2	1	0	B	TCF3/PBX1fusion	Abnormal,47,XY,+del(1)(q12q41),del(1)(p13p33),del(6)(q13q25),i(9)(q10),del(13)(q14)[15]/46,XY[5]	Intermediate
53	G/T	F	4.92	78	110	0	L2	0	0	B	TEL-AML1fusion	Abnormal,46,XX,t(8;12;15)(q11.2;p11.2;q11.2),del(11)(q21)[15]/46,XX[5]	Low
54	G	F	4.68	85	3	0	L2	1	0	B	TEL-AML1fusion	Abnormal,92,XXXX[4]/46,XX[16]	High
55	G	M	410.01	99	103	1	L2	1	0	B	BCR, ABL1, ASS2 tri-colour fusion	Abnormal,46,XY,t(9;22)(q34;q11.2)[20]	Intermediate
56	G	F	6.17	93	71	1	L3	1	0	B	TEL-AML1fusion	Abnormal,46,XX,del(11)(q23)[12]/46,XX[8]	Low
57	G	M	2.46	79	31	1	L2	0	0	B	TEL-AML1fusion	Abnormal,46,XY,t(10;11)(q21;q23)[5]/46,XY[15]	Low
58	G	F	38.85	83	91	0	L2	1	0	B	TEL-AML1fusion	Abnormal,46,XX,del(6)(q13q23)[10]/46,XX[10]	Low
59	G	M	5.42	84	55	0	L2	1	0	B	Normal	Normal	Intermediate
60	T	M	2.5	67	65	1	L2	1	0	B	Normal	Normal	Low
61	G	F	3.22	118	207	1	Unknown	1	0	B	Normal	Normal	Low
62	G	F	1.44	106	127	1	Unknown	0	0	Mixed	MLL break	Normal	Intermediate
63	G	M	47.35	48	8	1	L3	1	0	B	TEL-AML1fusion	Normal	Intermediate
64	G	M	4.96	72	119	1	L3	0	0	B	TEL-AML1fusion	Abnormal,46,XY,i(6)(p10)[4]/46,XY[16]	Low
65	G	M	2.24	79	100	1	Unknown	0	0	B	Normal	Not done	Low
66	G	M	4.78	123	55	1	L2	0	0	T	Normal	Normal	Intermediate
67	G	F	38.04	84	73	1	L1	0	0	B	Normal	Abnormal,56,XX,+X,+X,dup(1)(q22q42),+4,+6,+10,+14,+17,+18,+21,+21[12]/56,XX,idem,+1,-dup(1)(q22q42),der(2)t(1;2)(q12;p23)[5]/46,XX[3]	Low
68	G	M	48.23	101	88	1	Unknown	1	0	B	Normal	Abnormal,56,XY,+X,+4,+6,+8,+10,+14,+17,+18,+21,+21[20]	Intermediate
69	GT	M	39.53	125	62	1	L1	1	0	T	Normal	Normal	Intermediate
70	GT	M	4.32	122	133	1	Unknown	1	0	B	Normal	Normal	Low
71	GT	M	3.35	100	164	1	L2	1	0	B	Normal	Normal	Low
72	GT	M	13	67	21	1	L3	1	0	B	Normal	Normal	Low
73	G	F	23.05	96	12	0	L2	0	0	B	Normal	Abnormal,65,XX,+X,+del(1)t(1;9)(p22;p12),+2,+4,+6,+8,+9,+10,+10,+11,+12,+14,+15,+17,+18,+21,+21,+22,+22[19]/46,XX[1]	Low
74	G	F	2.74	79	197	1	L2	1	0	T	Normal	Abnormal,47,XX,del(5)(q22q25),del(7)(q22),del(12)(p11.2),+13[7]/46,XX[13]	Intermediate
75	G	M	0.84	58	81	0	L2	1	0	B	Normal	Abnormal,56,XY,+X,+4,+6,+8,+10,+14,+17,+18,+21,+22[20]	Intermediate
76	G	F	25.76	86	35	1	L2	1	0	B	Normal	Abnormal,55,XX,+X,+4,+6,+8,+10,+14,+17,+21,+21[12]/46,XX[8]	Intermediate
77	G	F	34.3	103	72	1	L2	1	0	B	Normal	Normal	Intermediate
78	GT	M	——	——	——	1	L2	1	0	B	C-myc break	Normal	Low
79	GT	F	6.28	74	34	0	L2	1	0	B	TEL-AML1fusion	Normal	Low
80	G	F	25.87	74	58	1	L2	1	0	B	TCF3/PBX1fusion	Abnormal,46,XX,del(6)(q13q23),del(7)(q32q34),der(19)t(1;19)(q23;p13)[15]/46,XX[5]	Intermediate
81	G	F	9.86	119	11	1	L2	1	0	B	Normal	Abnormal,55,XX,+5,+8,+9,+10,+14,+17,+21,+21,+21[5]/46,XX[15]	Intermediate
82	G	F	14.93	83	122	1	L2	1	0	B	TCF3/PBX1fusion	Abnormal,46,XX,t(1;19)(q23;p13)[14]/92,idem*2,del(13)(q13)*2[6]	High
83	GT	M	72.23	72	199	0	L1	1	0	B	Normal	Not done	Intermediate
84	G	M	3.79	153	293	1	L2	0	0	T	MLL break	Not done	Intermediate
85	GT	F	24.83	73	115	1	L2	1	0	Mixed	Normal	Not done	Low
86	G	F	10.79	80	212	1	L2	1	0	B	TEL-AML1fusion	Not done	Low
87	GT	M	11.53	128	468	1	L2	0	0	T	Normal	Not done	Intermediate
88	GT	M	206.05	110	136	1	L2	1	0	T	Normal	Not done	Low
89	G	M	5.79	120	284	1	L2	0	0	B	Normal	Normal	Intermediate
90	G	M	25.97	101	129	1	L2	0	0	B	Normal	Abnormal,46,XY,inv(9)(p12q13)[10]/55,idem,+X,dup(1)(q23q42),+4,+6,+10,+10,+14,+18,+21,+21[10]	Intermediate
91	G	M	1.88	93	115	1	L2	0	0	B	Normal	Abnormal,59,XY,+X,dup(1)(q23q42),+4,+5,+6,+8,+add(9)(q34),+10,+12,+13,+14,+18,+19,+21,+21[11]/46,XY[9]	Low
92	G	F	7.39	92	53	1	L1	1	0	B	Normal	Abnormal,56,XX,+X,+4,+6,+7,+10,+14,+18,+21,+add(21)(q22)[6]/46,XX[14]	Low
93	G	F	2.21	88	79	0	L2	0	0	B	Normal	Normal	Intermediate
94	G	M	5.51	102	558	0	Unknown	0	0	B	Not done	Abnormal,46,XY,dup(1)(q32q42),del(5)(q11;2q21),add(9)(q34),del(1.3)(q14),+16,-17[5]/46,XY[15]	Intermediate
95	G	M	2.03	95	399	0	Unknown	0	0	T	Normal	Abnormal,46,XY,+(6;11)(q23;p15)[20]	Intermediate
96	G	M	1.89	89	109	1	L1	1	0	B	Normal	Abnormal,59,+X,+4,+6,+7,+8,+10,+14,+14,+18,+18,der(19)t(1;19)(q21;p13.3),+20,+21,+21[9]/46,XY[11]	Low
97	GT	F	8.23	128	192	0	Unknown	0	0	B	TEL-AML1fusion	Abnormal,46,XX,der(6)t(6;12)(q24;p12),der(12)t(6;12)(q21;q24.1)del(12)(p12)[7]/46,XX[13]	Intermediate
98	GT	M	123.6	61	17	1	L2	1	0	B	Normal	Abnormal,45,XY,dic(9;20)(p11.2;q11.2)[20]	Intermediate
99	G	F	44.55	71	161	1	L1	1	0	B	Normal	Not done	Intermediate
100	G	M	3.88	69	19	1	L1	1	0	B	Normal	Abnormal,60,XY,+X,+4,+5,+6,+8,+12,+14,+14,+17,+18,+18,+21,+21[18]/46,XY[2]	Low
101	G	F	8.33	107	131	1	L2	1	0	B	Normal	Abnormal,47,XX,add(12)(p12),del(14)(q24),add(17)(p13),+19[1]/46,XX[19]	Low
102	GT	M	6.85	106	51	1	L1	0	0	B	MLL break	Abnormal,46,XY,t(11;19)(q23;p13)[18]/44,idem,-5,del(6)(q21),der(7;9)(q10;q10),add(13)(q34)[2]	Low
103	T	M	3.06	97	139	0	L2	1	0	B	Normal	Normal	Intermediate
104	GT	M	6.52	121	49	1	L3	0	0	B	Normal	Abnormal,46,XY,t(2;3)(p22;q26)[8]	Low
105	G	M	56.11	87	220	0	Unknown	1	0	B	Normal	Normal	Intermediate
106	GT	M	4.42	121	193	0	Unknown	0	0	B	Normal	Not done	Low
107	GT	M	7.78	93	183	0	L2	1	0	B	Normal	Normal	Intermediate
108	GT	M	14.99	88	27	1	L2	1	0	B	TEL-AML1fusion	Not done	Low
109	G	M	320.61	56	44	0	L2	1	0	B	MLL break	Abnormal,46,XX,t(4;11)(q21;q23)[15]/46,XX[5]	Low
110	G	F	5.09	75	32	1	L2	1	0	B	Normal	Abnormal,58,XX,+X,+5,+6,+8,+14,+14,+15,+18,+20,+21,+21,+22[10]/46,XX[10]	Low

## Sheet: Control
Control	SNP	Sex	Age (year)
1	G	F	10
2	G/T	F	1
3	G/T	F	7
4	G	F	4
5	G/T	F	7
6	G/T	F	5
7	T	F	9
8	G	M	9
9	G/T	M	9
10	T	M	1
11	G	F	0.83
12	G	M	7
13	G	F	9
14	G/T	M	6
15	G	M	6
16	G	F	0.67
17	G	M	3
18	G	M	3
19	G/T	F	11
20	G	M	1.25
21	G	M	1.46
22	G	M	6
23	G	M	3
24	G/T	M	12
25	G	M	0.83
26	G	F	6
27	G/T	M	6
28	G	F	2
29	G	F	3
30	G	F	3
31	G	F	8
32	G	M	0.42
33	G/T	M	14
34	G	M	4
35	G/T	M	1
36	G/T	M	8
37	G	F	3
38	G	M	7
39	G	F	7
40	G	F	8
41	G	M	7
42	G	M	8
43	G	F	8
44	G/T	M	6
45	G	M	6
46	G/T	F	3
47	G	F	8
48	G/T	M	12
49	G	F	7
50	G/T	M	6
51	G	F	5
52	G	M	3
53	G	M	8
54	G	M	8
55	G	M	8
56	G	F	14
57	G	F	3
58	G	M	10
59	G/T	M	11
60	G	F	4
61	T	M	7
62	G	M	5
63	T	F	12
64	T	M	8
65	G/T	F	6
66	G/T	F	6
67	T	F	10
68	G/T	F	12
69	G	F	6
70	G/T	M	7
71	G	M	15
72	G	M	7
73	G	F	3
74	G	M	7
75	G/T	F	0.83
76	G	M	14
77	G/T	F	10
78	G	M	10
79	G	M	0.17
80	G	F	10
81	G	M	4
82	G/T	F	1.33
83	G	M	2
84	G	F	2
85	G/T	M	1.17
86	G	F	3
87	G/T	F	6
88	G	F	4
89	G	M	5
90	G	F	5
91	G	M	5
92	G	M	2
93	G	M	0.75
94	T	F	1
95	G	M	5
96	G	F	3
97	G	F	13
98	GT	F	6
99	GT	M	0.58
100	G	M	9
101	G	F	4
102	G	F	3
103	GT	M	7
104	GT	M	7
105	GT	F	2
